# Supplementary material for: Aptamer-functionalized pH-sensitive liposomes for a selective delivery of echinomycin into cancer cells
Source: PubMed Central journal article supplement — RSC Adv. 2021 Sep 1;11(47):29164–77. doi: 10.1039/d1ra05138e (PMC9040599; doi:10.1039/d1ra05138e), 2021-09-01
Supplement: RA-011-D1RA05138E-s001.pdf [file RA-011-D1RA05138E-s001.pdf]

## Supplementary

# Aptamer-functionalized pH-sensitive liposomes for selective delivery of echinomycin into cancer cells

Zainab Lafi <sup>a,b</sup>, Walhan Alshaer <sup>c\*</sup>, Ma'mon M. Hatmal <sup>d</sup>, Malek Zihlif <sup>f</sup>, Dana A. Alqudah <sup>c</sup>,  
Hamdi Nsairat <sup>f</sup>, Hanan Azzam <sup>g</sup>, Talal Aburjai <sup>h</sup>, Yasser Bustanji <sup>h, i\*</sup>, Abdalla Awidi <sup>c,j,k</sup>

<sup>a</sup>Faculty of Pharmacy, The Middle East University, Amman, Jordan

<sup>b</sup>Department of Clinical Pharmacy, Faculty of Pharmacy, The University of Jordan, Amman 11942, Jordan

<sup>c</sup>Cell Therapy Center, The University of Jordan, Amman 11942, Jordan

<sup>d</sup>Department of Medical Laboratory Sciences, Faculty of Applied Medical Sciences, The Hashemite University, Zarqa 13133, Jordan

<sup>e</sup>Department of Pharmacology, Faculty of Medicine, The University of Jordan, Amman 11942, Jordan

<sup>f</sup>Pharmacological and Diagnostic Research Center, Faculty of Pharmacy, Al-Ahliyya Amman University, Amman 19328, Jordan

<sup>g</sup>HMCSR, The University of Jordan, Amman 11942, Jordan

<sup>h</sup>Department of Pharmaceutical Sciences, Faculty of Pharmacy, The University of Jordan, Amman 11942, Jordan

<sup>i</sup>Department of Basic Medical Sciences, College of Medicine, University of Sharjah, Sharjah 27272, UAE.

<sup>j</sup>Department of Internal Medicine, Faculty of Medicine, The University of Jordan, Amman 11942, Jordan

<sup>k</sup>Department of Hematology and Oncology, Jordan University Hospital, The University of Jordan, Amman 11942, Jordan

\*Corresponding authors:

**Dr. Walhan Alshaer**

Cell Therapy Center

The University of Jordan

Amman-Jordan

E-mail [walhan.alshaer@ju.edu.jo](mailto:walhan.alshaer@ju.edu.jo)

Tel: +962 65355000 Ext. 23960; +962 790823678

**Prof. Yasser Bustanji**

Faculty of Pharmacy,

The University of Jordan

Amman-Jordan

E-mail: [bustanji@ju.edu.jo](mailto:bustanji@ju.edu.jo)

Tel: +962 798515388

**Table S1:** Effect of lyoprotectant of the freeze-dried free liposome (Lip<sub>pH</sub>) on Mean hydrodynamic diameter (size), Polydispersity index (PDI) and Zeta-potential (mV).

| Ratio of sugar                | Mean hydrodynamic diameter<br>(nm ± SD) |                | Polydispersity index<br>(PDI ± SD) |             | Zeta potential<br>(mV ± SD) |            |
|-------------------------------|-----------------------------------------|----------------|------------------------------------|-------------|-----------------------------|------------|
|                               | Sucrose                                 | Trehalose      | Sucrose                            | Trehalose   | Sucrose                     | Trehalose  |
| Initial (before freeze-dried) | 124 ± 9                                 |                | 0.09 ± 0.06                        |             | -17.0 ± 2.0                 |            |
| Without sugar                 | 863.70 ± 285.75                         |                | 0.67 ± 0.02                        |             | -12 ± 7.6                   |            |
| 1%                            | 252.3 ± 9.56                            | 323.30 ± 32.10 | 0.37 ± 0.27                        | 0.48 ± 0.06 | -                           | -          |
| 2.5%                          | 148.73 ± 15.98                          | 191.17 ± 4.80  | 0.19 ± 0.13                        | 0.34 ± 0.19 | -12 ± 3.01                  | -24 ± 4.6  |
| 5%                            | 131.07 ± 3.69                           | 181.50 ± 12.02 | 0.11 ± 0.09                        | 0.36 ± 0.08 | -16 ± 2.73                  | -17 ± 2.82 |
| 10%                           | 133.00 ± 1.00                           | 162.53 ± 17.07 | 0.16 ± 0.09                        | 0.27 ± 0.05 | -16 ± 4.04                  | -20 ± 3.10 |
